# Supplementary material
Source: MDPI journal article supplement (https://www.mdpi.com/2504-3900/39/1/4)
Supplement: s1 [file s1]

## **Corrections list**

Manuscript ID: proceedings-692039

Type of manuscript: Proceedings

Title: VW-Aero Engine Cylinder Head Cooling Efficiency Investigation

Authors: Rapee Ujjin \*, Choosak Ngaongam

---

- Name and affiliation have been checked.
- Email has been updated.
- References [10-16] have been re-ordered and updated.
- Figure 6 has been referred to the text.
- Missing information in Reference 2 and 3 have been corrected.
- References 5-15 were re-ordered and had appeared in the text.
- Missing information in Reference 13 has been corrected.

Along with aforementioned corrections, there were also some corrections that had been made as following;

- Addition of Table 4 for engine working condition clarification.
- Re-adjust font type and size within the graph in Figure 4 and 6.
